# Supplementary material
Source: MDPI journal article supplement (https://www.mdpi.com/2073-4344/13/2/333)
Supplement: s1 [file s1]

# **New Ni(II)-Ni(II) dinuclear complex, a resting state of ( $\alpha$ -diimine)NiBr<sub>2</sub>/AlMe<sub>3</sub> catalyst system of ethylene polymerization**

Igor E. Soshnikov,<sup>a,\*</sup> Nina V. Semikolenova,<sup>a</sup> Anna A. Bryliakova,<sup>a,b</sup> Artem A. Antonov,<sup>a</sup>  
Konstantin P. Bryliakov,<sup>a</sup> Evgenii P. Talsi<sup>a,\*</sup>

<sup>a</sup> *Boriskov Institute of Catalysis, Pr. Lavrentieva 5, Novosibirsk 630090, Russia*

<sup>b</sup> *Novosibirsk State University, Pirogova 1, Novosibirsk 630090, Russia*

\*Correspondence: soshnikov@catalysis.ru, talsi@catalysis.ru

## **Electronic Supplementary Information**

### **Table of Contents**

|                                                            |               |
|------------------------------------------------------------|---------------|
| <b>Figures S1-S4.....</b>                                  | <b>S2-S5</b>  |
| <b>Table S1 .....</b>                                      | <b>S6</b>     |
| <b>Cartesian coordinates and calculated energies .....</b> | <b>S7-S11</b> |

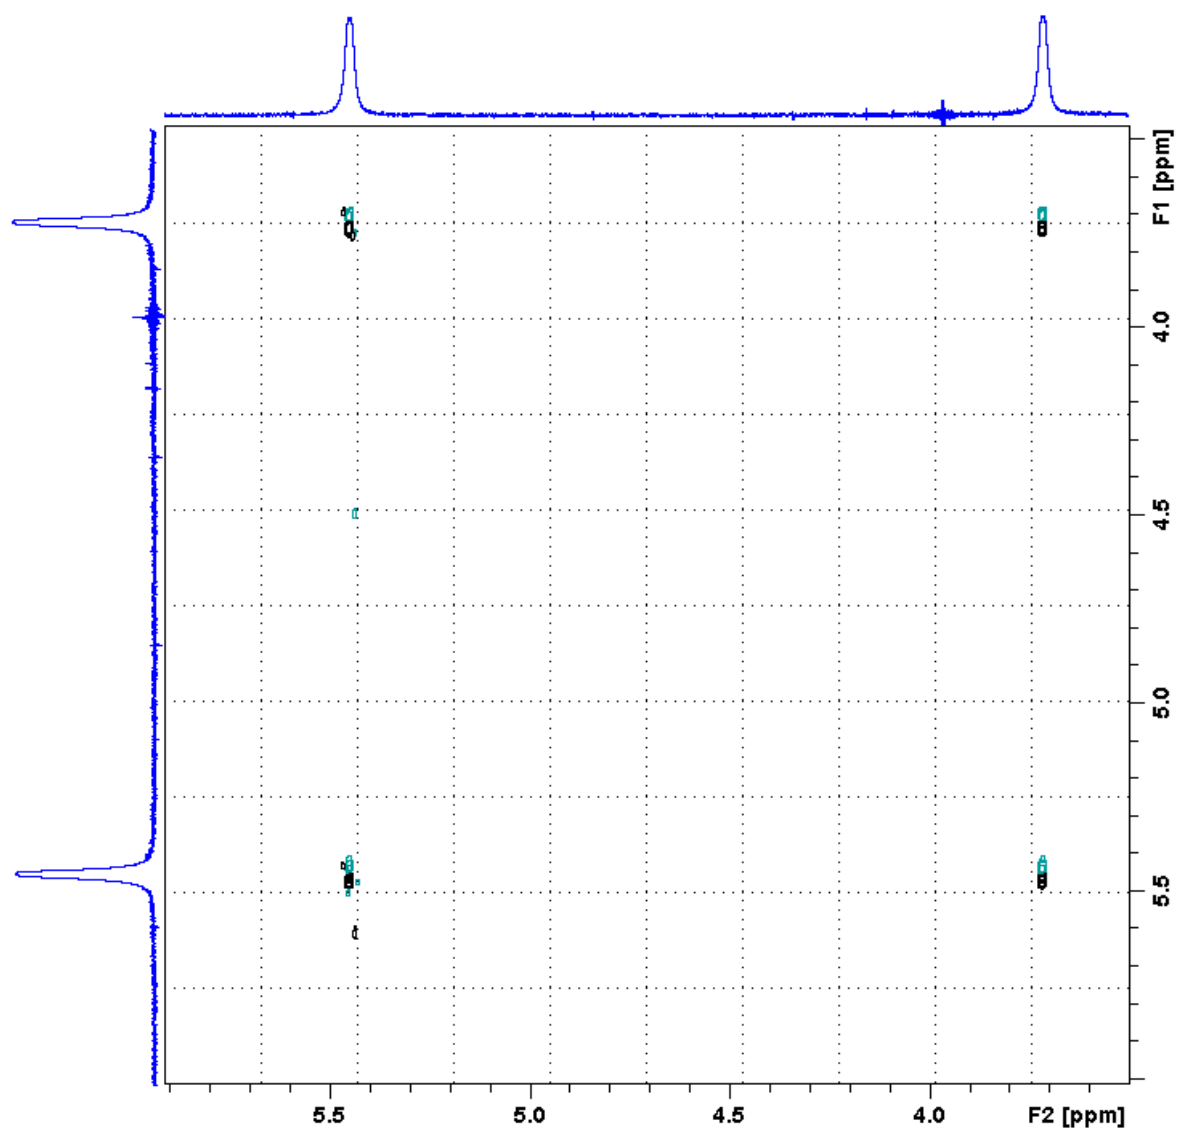

**Figure S1.**  $^1\text{H}$ - $^1\text{H}$  cosydfp NMR spectrum of the sample **1**/ $\text{AlMe}_3$  (toluene- $\text{d}_8$ ,  $[\text{Al}]/[\text{Ni}] = 10/1$ ,  $C_{\text{Ni}} = 5 \text{ mM}$ ), recorded at  $0^\circ\text{C}$ .

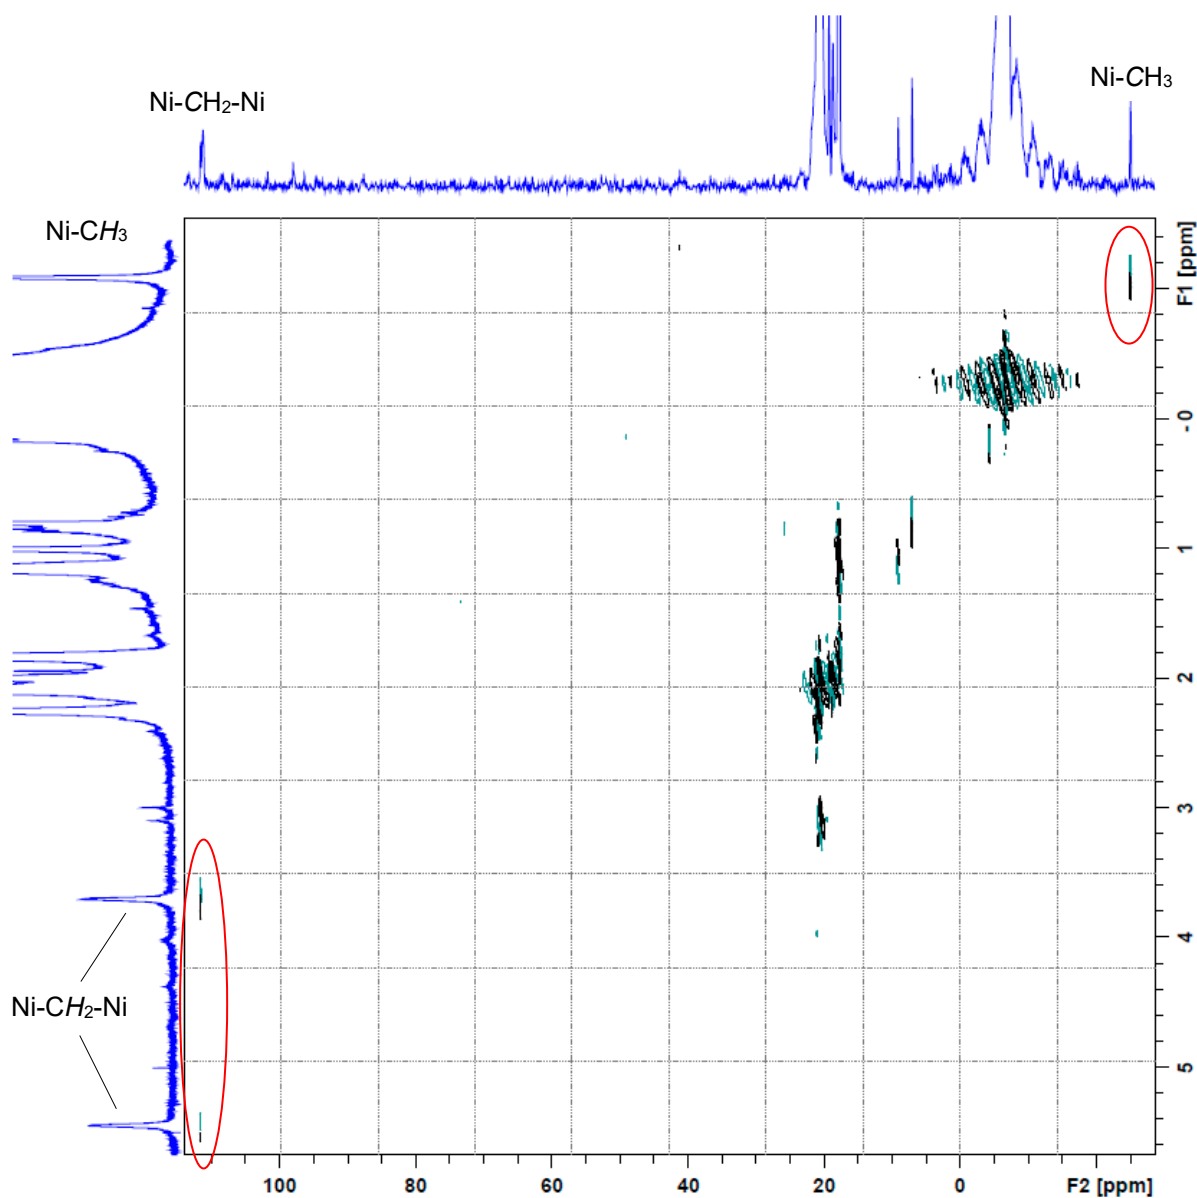

**Figure S2.**  $^1\text{H}$ - $^{13}\text{C}$  hzdeptbqf NMR spectrum of the sample **1**/ $\text{AlMe}_3$  (toluene- $\text{d}_8$  (0.5 ml) + 1,2-difluorobenzene (0.2 ml),  $[\text{Al}]/[\text{Ni}] = 10/1$ ,  $C_{\text{Ni}} = 30 \text{ mM}$ ), recorded at  $0^\circ\text{C}$ . To increase the solubility of **2** at  $0^\circ\text{C}$ , ca. 0.2 ml of 1,2-difluorobenzene was added to the **1**/ $\text{AlMe}_3$  sample.

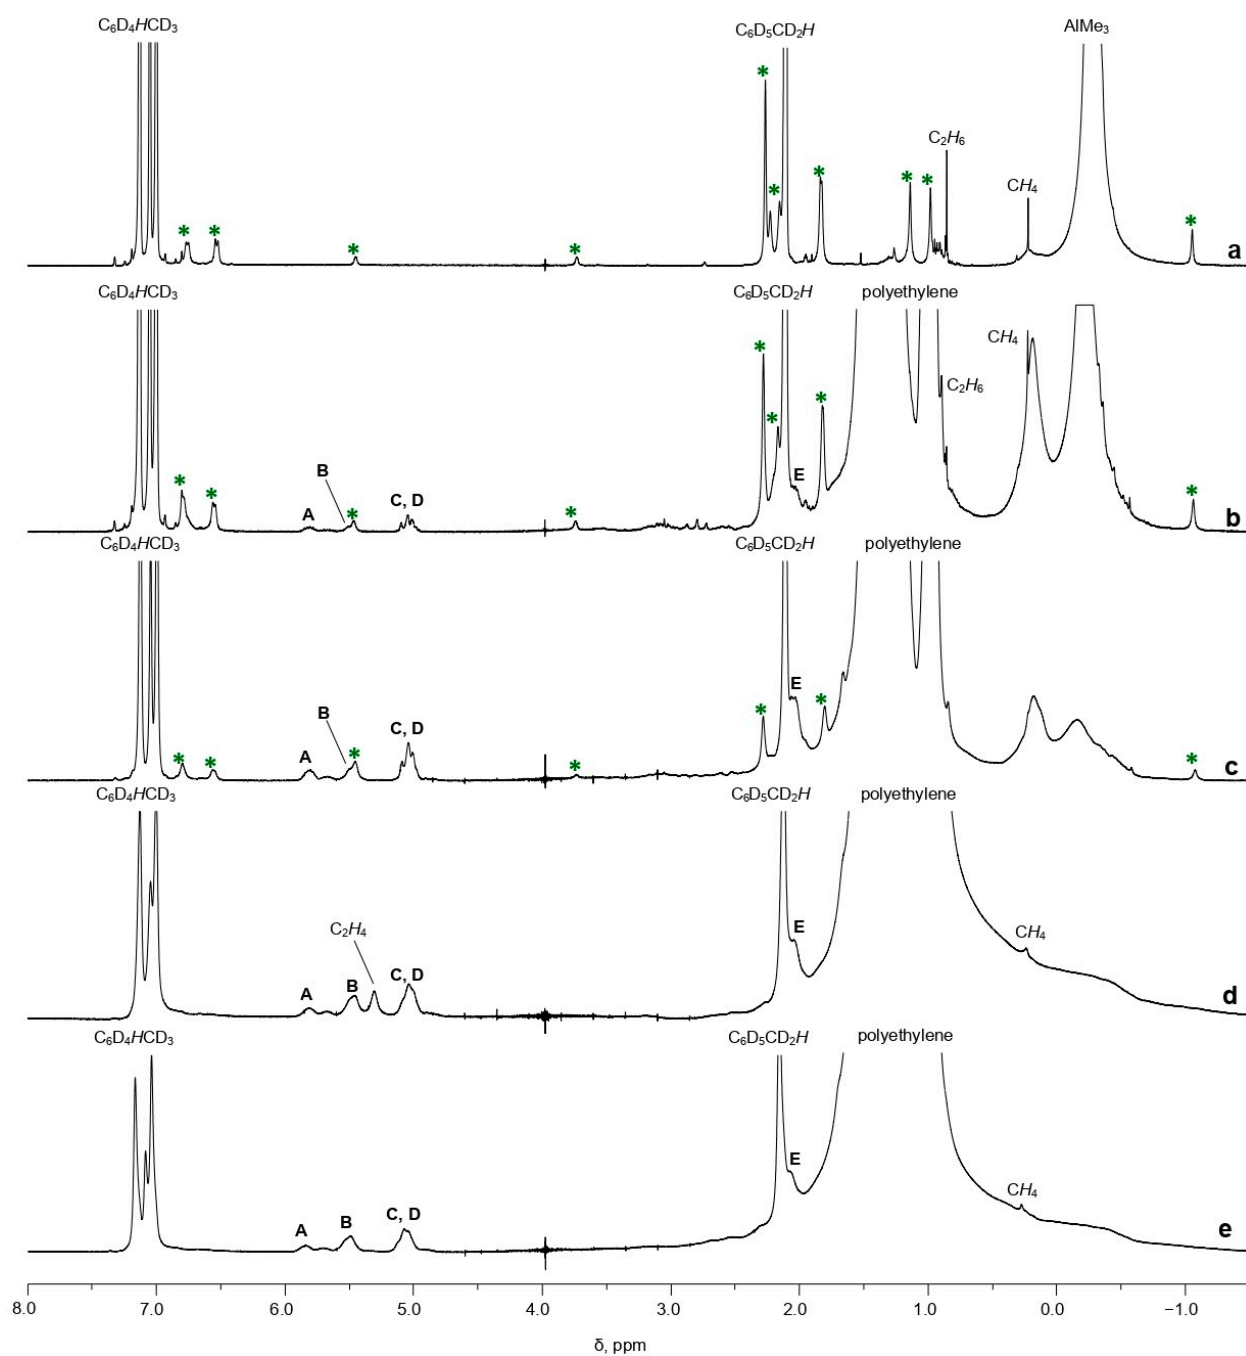

**Figure S3.**  $^1\text{H}$  NMR spectra (toluene- $d_8$ ,  $0\text{ }^\circ\text{C}$ ) of the samples:

- $1/\text{AlMe}_3$  ( $\text{Al/Ni} = 10/1$ ,  $\text{C}_{\text{Ni}} = 5\text{ mM}$ ), mixed and stored during 1 h at  $25\text{ }^\circ\text{C}$
- sample in (a) after bubbling ethylene for 30s at  $25\text{ }^\circ\text{C}$
- sample in (b) after bubbling ethylene for 30s at  $25\text{ }^\circ\text{C}$
- sample in (c) after bubbling ethylene for 30s at  $25\text{ }^\circ\text{C}$
- sample in (d) after storing for 10 min at  $0\text{ }^\circ\text{C}$

Peaks marked by asterisks belong to the complex 2. Peaks marked by A, B, C, D, and E correspond to the following protons of double-bond moieties of the polymer molecules:

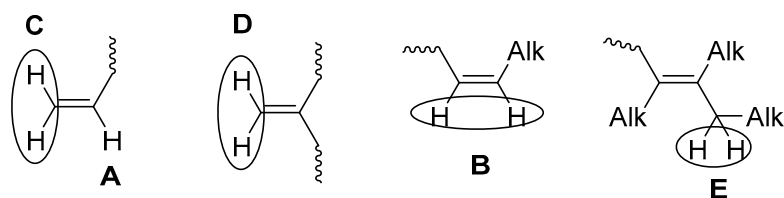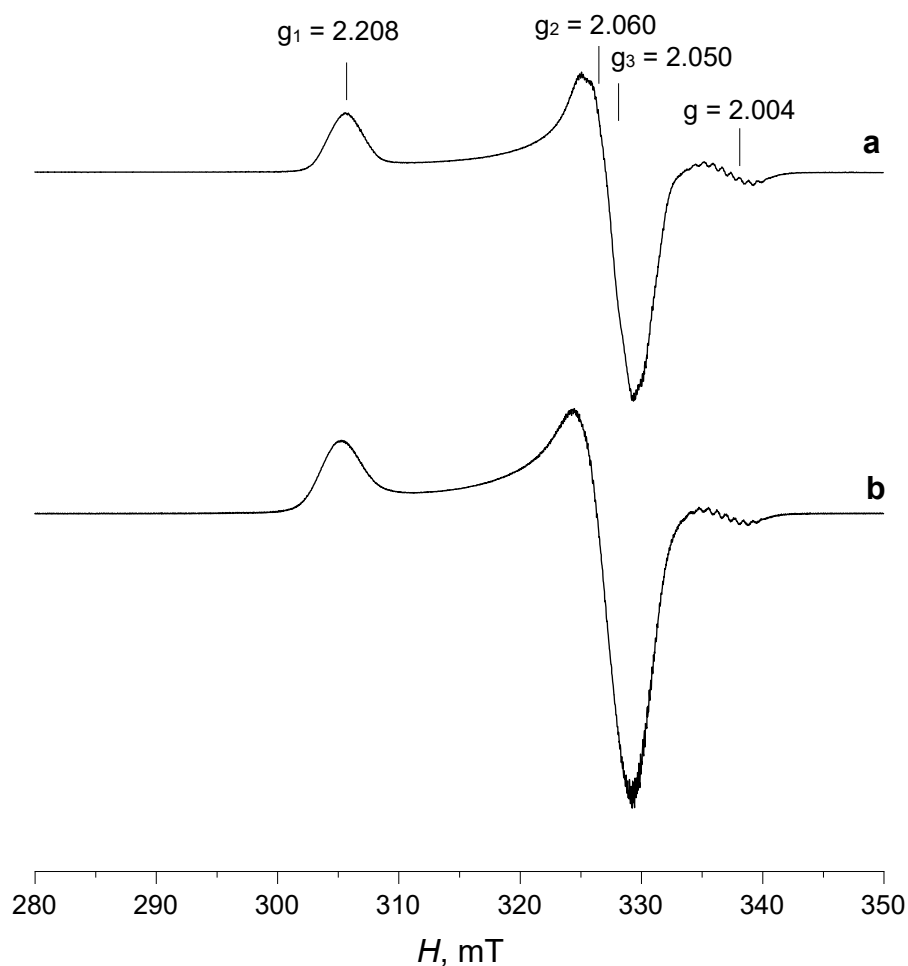

**Figure S4.** EPR spectra (toluene- $d^8$ ,  $-196\text{ }^{\circ}\text{C}$ ) of the samples:

- a) **1**/ $\text{AlMe}_3$  ( $\text{Al/Ni} = 10/1$ ,  $C_{\text{Ni}} = 5\text{ mM}$ ), mixed and stored during 1 h at  $25\text{ }^{\circ}\text{C}$
- b) sample in (a) ethylene bubbling ( $3 \times 30\text{ s}$ ) at  $25\text{ }^{\circ}\text{C}$

The resonances at  $g_1 = 2.208$ ,  $g_2 = 2.060$ , and  $g_3 = 2.050$  belong to the neutral heterobinuclear  $\text{Ni(I)}$  complex  $[\text{LNi}^{\text{I}}(\mu\text{-Me})_2\text{AlMe}_2]$ . The multiplet at  $g = 2.004$  corresponds to the radical  $\text{L}^{\bullet(-)}\text{AlMe}_2$ , formed via ligand transfer from Ni to Al.

**Table S1. The integral intensities of  $^1\text{H}$  NMR resonances of 2 (toluene- $\text{d}_8$ , recorded at 0 °C).**

|                | Ar- $H_o$ | Ar- $\text{CH}_3$ p | Ar- $\text{CH}_3$ o |      |      | $\text{CH}_3\text{-C=N}$ |      | Ni- $\text{CH}_3$ | Ni- $\text{CH}_2$ |      |
|----------------|-----------|---------------------|---------------------|------|------|--------------------------|------|-------------------|-------------------|------|
| $\delta$ , ppm | 6.5-6.8   | 2.26                | 2.14, 2.21          | 1.83 | 1.82 | 0.98                     | 1.14 | -1.07             | 5.44              | 3.72 |
| integral       | 4.00      | 5.98                | 5.84                | 5.90 |      | 3.13                     | 2.96 | 1.51              | 1.02              | 1.05 |

**DFT optimized Cartesian coordinates and potential energies (Ha) for the calculated structures**

**$^1[\text{LNi}^{\text{II}}(\mu\text{-Me})(\mu\text{-CH}_2)\text{Ni}^{\text{II}}\text{L}]^+\text{Br}^-$  in toluene (Ni green, N violet, Br orange, C grey)**

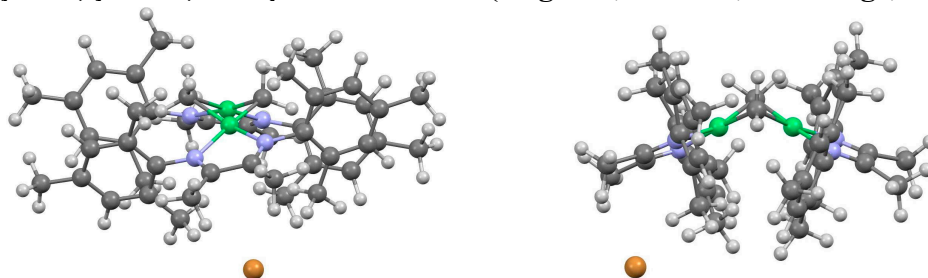

**Potential energy = -7600.3314761 Ha, Gibbs free energy = -7599.466929 Ha (0.0 kcal/mol)**

|    |           |           |           |
|----|-----------|-----------|-----------|
| 35 | 1.623369  | 4.269337  | 2.795420  |
| 6  | 0.093161  | 3.431001  | -0.549512 |
| 6  | 1.522282  | 3.088332  | -0.807611 |
| 7  | -0.700710 | 2.415263  | -0.582826 |
| 6  | 2.565408  | 4.154264  | -0.795798 |
| 6  | -0.303483 | 4.843710  | -0.277595 |
| 7  | 1.736548  | 1.830655  | -1.021740 |
| 6  | 3.060649  | 1.331812  | -1.259141 |
| 6  | -2.092360 | 2.546592  | -0.290609 |
| 6  | -3.002100 | 2.836859  | -1.316641 |
| 6  | -4.360432 | 2.858471  | -1.001284 |
| 6  | -4.819589 | 2.616934  | 0.295933  |
| 6  | -3.879916 | 2.347005  | 1.290354  |
| 6  | -2.510747 | 2.293101  | 1.021524  |
| 6  | 3.478633  | 1.118606  | -2.578290 |
| 6  | 4.730429  | 0.538703  | -2.783646 |
| 6  | 5.552479  | 0.165779  | -1.717269 |
| 6  | 5.097236  | 0.396193  | -0.418734 |
| 6  | 3.853637  | 0.976182  | -0.161880 |
| 6  | -2.514040 | 3.144669  | -2.709289 |
| 6  | -1.494290 | 1.984676  | 2.087546  |
| 6  | -6.297570 | 2.645731  | 0.599478  |
| 6  | 3.349462  | 1.193578  | 1.236418  |
| 6  | 2.578716  | 1.492451  | -3.726403 |
| 6  | 6.878922  | -0.510704 | -1.965783 |
| 6  | -0.284298 | -3.826066 | 1.253649  |
| 6  | -1.737402 | -3.646205 | 1.032819  |
| 7  | 0.465157  | -3.002933 | 0.588875  |
| 6  | -2.718828 | -4.628618 | 1.595157  |
| 6  | 0.211186  | -4.874082 | 2.202126  |
| 7  | -2.037260 | -2.597122 | 0.342311  |
| 6  | -3.394311 | -2.270826 | 0.033049  |
| 6  | 1.883947  | -2.989100 | 0.800956  |
| 6  | 2.392186  | -2.241009 | 1.868233  |
| 6  | 3.779275  | -2.174490 | 2.015123  |
| 6  | 4.646527  | -2.813662 | 1.130425  |
| 6  | 4.096315  | -3.540168 | 0.070443  |
| 6  | 2.719256  | -3.639166 | -0.116732 |
| 6  | -4.079406 | -1.403950 | 0.893508  |
| 6  | -5.352227 | -0.975396 | 0.519252  |
| 6  | -5.945151 | -1.387406 | -0.675755 |
| 6  | -5.242656 | -2.277487 | -1.490631 |
| 6  | -3.967586 | -2.736671 | -1.156819 |
| 6  | 1.462790  | -1.505196 | 2.799357  |

|    |           |           |           |
|----|-----------|-----------|-----------|
| 6  | 2.123209  | -4.391063 | -1.276816 |
| 6  | 6.143010  | -2.720565 | 1.296171  |
| 6  | -3.238462 | -3.728746 | -2.028162 |
| 6  | -3.442114 | -0.977064 | 2.187761  |
| 6  | -7.293837 | -0.856587 | -1.095736 |
| 28 | 0.199790  | 0.682018  | -1.053565 |
| 28 | -0.433585 | -1.662603 | -0.461826 |
| 6  | 1.057428  | -0.944229 | -1.351566 |
| 6  | -1.504992 | -0.350546 | -1.599759 |
| 1  | 3.545671  | 3.758705  | -1.053287 |
| 1  | 2.604636  | 4.592247  | 0.207229  |
| 1  | 2.306787  | 4.952695  | -1.497208 |
| 1  | -1.377037 | 4.932603  | -0.123629 |
| 1  | 0.215884  | 5.190839  | 0.621373  |
| 1  | -0.007792 | 5.490281  | -1.109398 |
| 1  | -5.078546 | 3.073074  | -1.788849 |
| 1  | -4.217039 | 2.169961  | 2.307509  |
| 1  | 5.067934  | 0.367893  | -3.802820 |
| 1  | 5.719297  | 0.109435  | 0.423661  |
| 1  | -3.340786 | 3.176180  | -3.420760 |
| 1  | -2.008105 | 4.115498  | -2.745189 |
| 1  | -1.792653 | 2.401958  | -3.057983 |
| 1  | -1.974332 | 1.715210  | 3.029417  |
| 1  | -0.823644 | 2.827900  | 2.279275  |
| 1  | -0.846184 | 1.157227  | 1.776916  |
| 1  | -6.729058 | 3.629897  | 0.392315  |
| 1  | -6.498452 | 2.412176  | 1.647374  |
| 1  | -6.841260 | 1.920747  | -0.013339 |
| 1  | 4.038633  | 0.781416  | 1.973467  |
| 1  | 3.194285  | 2.249514  | 1.472600  |
| 1  | 2.375785  | 0.715742  | 1.372020  |
| 1  | 3.018362  | 1.213189  | -4.685351 |
| 1  | 2.377791  | 2.568302  | -3.748584 |
| 1  | 1.608422  | 0.994049  | -3.630732 |
| 1  | 7.572671  | -0.355190 | -1.136252 |
| 1  | 7.356890  | -0.140565 | -2.876313 |
| 1  | 6.750701  | -1.592579 | -2.085606 |
| 1  | -3.743483 | -4.325064 | 1.390278  |
| 1  | -2.591651 | -4.727991 | 2.676501  |
| 1  | -2.556763 | -5.621423 | 1.164305  |
| 1  | 1.296906  | -4.937788 | 2.195818  |
| 1  | -0.115211 | -4.653108 | 3.223110  |
| 1  | -0.201680 | -5.852684 | 1.943493  |
| 1  | 4.187631  | -1.589435 | 2.833485  |
| 1  | 4.758073  | -4.030039 | -0.639066 |
| 1  | -5.885712 | -0.292175 | 1.172715  |
| 1  | -5.694973 | -2.620949 | -2.417295 |
| 1  | 2.009728  | -0.828058 | 3.454999  |
| 1  | 0.893690  | -2.194303 | 3.432111  |
| 1  | 0.732698  | -0.914918 | 2.236921  |
| 1  | 2.897285  | -4.764711 | -1.948662 |
| 1  | 1.527566  | -5.246432 | -0.941137 |
| 1  | 1.452037  | -3.741853 | -1.846995 |
| 1  | 6.625788  | -2.424115 | 0.361272  |
| 1  | 6.419296  | -1.990992 | 2.060194  |
| 1  | 6.571379  | -3.684357 | 1.589935  |
| 1  | -3.683402 | -3.784409 | -3.022833 |
| 1  | -2.181931 | -3.473312 | -2.140734 |
| 1  | -3.274348 | -4.734617 | -1.594725 |
| 1  | -4.044172 | -0.228329 | 2.700286  |
| 1  | -2.449525 | -0.557489 | 2.015796  |
| 1  | -3.314922 | -1.826922 | 2.867100  |
| 1  | -7.901457 | -0.569598 | -0.234452 |



|   |           |           |           |
|---|-----------|-----------|-----------|
| 1 | -7.182024 | 0.032267  | -1.726280 |
| 1 | -7.856190 | -1.593911 | -1.673895 |
| 1 | 1.085994  | -1.258743 | -2.407128 |
| 1 | 2.046695  | -1.087169 | -0.909520 |
| 1 | -1.248437 | 0.337048  | -2.425281 |
| 1 | -2.431284 | -0.019369 | -1.134442 |
| 1 | -1.686337 | -1.288784 | -2.145716 |

**$^3[\text{LNi}^{\text{II}}(\mu\text{-Me})(\mu\text{-CH}_2)\text{Ni}^{\text{II}}\text{L}]^+\text{Br}^-$  in toluene (Ni green, N violet, Br orange, C grey)**

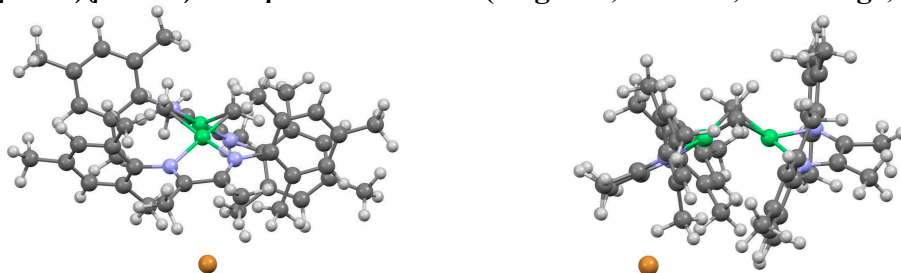

**Potential energy = -7600.3101345 Ha, Gibbs free energy = -7599.448161 Ha (+11.8 kcal/mol)**

|    |           |           |           |
|----|-----------|-----------|-----------|
| 35 | 1.688811  | 3.857248  | 2.716529  |
| 6  | 0.245187  | 3.473362  | -0.396778 |
| 6  | 1.638690  | 3.037894  | -0.739027 |
| 7  | -0.618456 | 2.518393  | -0.414931 |
| 6  | 2.734615  | 4.048214  | -0.813331 |
| 6  | -0.058708 | 4.917839  | -0.169131 |
| 7  | 1.762047  | 1.779186  | -1.001244 |
| 6  | 3.022487  | 1.198607  | -1.367102 |
| 6  | -2.001705 | 2.715945  | -0.116451 |
| 6  | -2.876240 | 3.203477  | -1.095372 |
| 6  | -4.243088 | 3.218363  | -0.805023 |
| 6  | -4.743204 | 2.766067  | 0.415530  |
| 6  | -3.835998 | 2.298446  | 1.369875  |
| 6  | -2.465758 | 2.248288  | 1.123194  |
| 6  | 3.247120  | 0.882920  | -2.714292 |
| 6  | 4.418002  | 0.198676  | -3.042865 |
| 6  | 5.348994  | -0.174190 | -2.071299 |
| 6  | 5.100618  | 0.184447  | -0.746261 |
| 6  | 3.947502  | 0.871960  | -0.366250 |
| 6  | -2.366743 | 3.682880  | -2.431436 |
| 6  | -1.494113 | 1.678584  | 2.118555  |
| 6  | -6.228162 | 2.724611  | 0.679583  |
| 6  | 3.697175  | 1.254572  | 1.063968  |
| 6  | 2.248375  | 1.281655  | -3.769930 |
| 6  | 6.573064  | -0.980256 | -2.430011 |
| 6  | -0.273125 | -3.711542 | 1.333179  |
| 6  | -1.666773 | -3.671013 | 1.004685  |
| 7  | 0.437107  | -2.654849 | 0.942628  |
| 6  | -2.623607 | -4.700986 | 1.533073  |
| 6  | 0.304043  | -4.880088 | 2.081985  |
| 7  | -2.022613 | -2.675636 | 0.201659  |
| 6  | -3.378119 | -2.432717 | -0.151964 |
| 6  | 1.851703  | -2.638991 | 1.107184  |
| 6  | 2.395271  | -1.847900 | 2.129135  |
| 6  | 3.780811  | -1.832724 | 2.292131  |
| 6  | 4.631112  | -2.540770 | 1.442626  |
| 6  | 4.060734  | -3.291942 | 0.413298  |
| 6  | 2.679719  | -3.366241 | 0.233571  |
| 6  | -4.198920 | -1.687919 | 0.710985  |
| 6  | -5.480085 | -1.344897 | 0.280531  |
| 6  | -5.963262 | -1.724151 | -0.973736 |

|    |           |           |           |
|----|-----------|-----------|-----------|
| 6  | -5.131987 | -2.484721 | -1.798436 |
| 6  | -3.840323 | -2.845393 | -1.410671 |
| 6  | 1.488349  | -1.034788 | 3.014654  |
| 6  | 2.085751  | -4.195624 | -0.875802 |
| 6  | 6.127858  | -2.500088 | 1.629703  |
| 6  | -2.948155 | -3.665352 | -2.307214 |
| 6  | -3.689417 | -1.269905 | 2.064529  |
| 6  | -7.332190 | -1.286603 | -1.434739 |
| 28 | 0.106017  | 0.738926  | -0.978147 |
| 28 | -0.559129 | -1.417366 | -0.193203 |
| 6  | 0.811798  | -0.952903 | -1.441108 |
| 6  | -1.728309 | -0.027742 | -1.410467 |
| 1  | 3.666717  | 3.604227  | -1.156006 |
| 1  | 2.879431  | 4.480715  | 0.179869  |
| 1  | 2.454398  | 4.859568  | -1.491423 |
| 1  | -1.074740 | 5.051090  | 0.196568  |
| 1  | 0.633904  | 5.335215  | 0.559778  |
| 1  | 0.050737  | 5.467591  | -1.111113 |
| 1  | -4.933299 | 3.581938  | -1.561690 |
| 1  | -4.205279 | 1.946969  | 2.328911  |
| 1  | 4.601395  | -0.054326 | -4.083780 |
| 1  | 5.817744  | -0.087009 | 0.021978  |
| 1  | -3.170278 | 3.716895  | -3.168806 |
| 1  | -1.944199 | 4.690275  | -2.360799 |
| 1  | -1.577713 | 3.034899  | -2.822207 |
| 1  | -1.994220 | 1.380632  | 3.040998  |
| 1  | -0.694596 | 2.381310  | 2.367264  |
| 1  | -1.001489 | 0.794434  | 1.694705  |
| 1  | -6.764954 | 3.478115  | 0.098542  |
| 1  | -6.454835 | 2.889308  | 1.735820  |
| 1  | -6.640540 | 1.746741  | 0.406373  |
| 1  | 4.453796  | 0.829395  | 1.721724  |
| 1  | 3.692058  | 2.335742  | 1.212543  |
| 1  | 2.719041  | 0.914704  | 1.405975  |
| 1  | 2.560024  | 0.943526  | -4.759396 |
| 1  | 2.120464  | 2.368048  | -3.810624 |
| 1  | 1.261483  | 0.857724  | -3.559384 |
| 1  | 7.438691  | -0.685658 | -1.831199 |
| 1  | 6.838753  | -0.869359 | -3.483821 |
| 1  | 6.401623  | -2.046865 | -2.246051 |
| 1  | -3.617710 | -4.571805 | 1.107387  |
| 1  | -2.710721 | -4.641408 | 2.623026  |
| 1  | -2.278939 | -5.712568 | 1.299524  |
| 1  | 1.340017  | -4.703090 | 2.364529  |
| 1  | -0.268949 | -5.075016 | 2.992856  |
| 1  | 0.267181  | -5.797249 | 1.484169  |
| 1  | 4.204998  | -1.230013 | 3.089791  |
| 1  | 4.708770  | -3.831229 | -0.273043 |
| 1  | -6.114504 | -0.758638 | 0.940240  |
| 1  | -5.493789 | -2.798835 | -2.774110 |
| 1  | 2.054405  | -0.401426 | 3.698143  |
| 1  | 0.824829  | -1.673444 | 3.605879  |
| 1  | 0.842195  | -0.385948 | 2.417044  |
| 1  | 2.841238  | -4.459034 | -1.618223 |
| 1  | 1.658494  | -5.128828 | -0.494178 |
| 1  | 1.277243  | -3.659849 | -1.379106 |
| 1  | 6.652055  | -2.553310 | 0.671952  |
| 1  | 6.445427  | -1.585526 | 2.136350  |
| 1  | 6.475128  | -3.343440 | 2.236426  |
| 1  | -3.408847 | -3.834447 | -3.282058 |
| 1  | -1.980801 | -3.178247 | -2.462217 |
| 1  | -2.729143 | -4.641835 | -1.863320 |
| 1  | -4.371404 | -0.569012 | 2.546552  |

|   |           |           |           |
|---|-----------|-----------|-----------|
| 1 | -2.710341 | -0.794320 | 1.986018  |
| 1 | -3.567946 | -2.131155 | 2.729315  |
| 1 | -8.046769 | -1.262332 | -0.607900 |
| 1 | -7.296722 | -0.277630 | -1.860377 |
| 1 | -7.731693 | -1.950736 | -2.204714 |
| 1 | 0.606567  | -1.279595 | -2.467065 |
| 1 | 1.829873  | -1.216439 | -1.147151 |
| 1 | -1.641282 | 0.725738  | -2.205684 |
| 1 | -2.571512 | 0.245259  | -0.779019 |
| 1 | -1.952453 | -0.948768 | -1.949874 |
